# Supplementary material for: Grandmaternal Perinatal Serum DDT in Relation to Granddaughter Early Menarche and Adult Obesity: Three Generations in the Child Health and Development Studies Cohort
Source: Oxford University Press journal article supplement (doi:10.1158/1055-9965.epi-20-1456), 2021-04-14
Supplement: 10559965epi201456-sup-232325_3_supp_6951558_qp5p17.docx [file 10559965epi201456-sup-232325_3_supp_6951558_qp5p17.docx]

| **Supplementary Table 1. Baseline Grandmaternal (F0) Characteristics by Participation in Daughter (F1) and Granddaughter (F2) Samples, 3-Generations of the Child Health and Development Studies (CHDS)** | | | | | | | | | | | | |
| --- | --- | --- | --- | --- | --- | --- | --- | --- | --- | --- | --- | --- |
|  |  | **F1 Telephone Interview (CATI)** | |  | **F1 In Person Visit (IPV)** | |  | **F2 In Person Visit (IPV)** | |  | **F2 Adult Questionnaire (Qx)** | |
|  |  | **PERCENT** | |  | **PERCENT** | |  | **PERCENT** | |  | **PERCENT** | |
|  |  | **Not in 3Gs CATI** | **In 3Gs CATI n=3,003** |  | **Not in IPV** | **In IPV n=1,195** |  | **Not in IPV** | **In IPV n=659** |  | **Not in Adult Qx** | **In Adult Qx n=358** |
| **Mother/Grandmother Race** | | |  |  |  |  |  |  |  |  |  |  |
|  | White | 65.2 | 72.4 |  | 66.3 | 68.6 |  | 66.4 | 67.6 |  | 66.5 | 63.9 |
|  | Black | 24.6 | 17.5 |  | 23.6 | 21.1 |  | 23.5 | 20.0 |  | 23.4 | 23.8 |
|  | Hispanic | 3.4 | 3.1 |  | 3.3 | 3.0 |  | 3.3 | 5.2 |  | 3.3 | 5.3 |
|  | Asian | 3.9 | 4.1 |  | 3.9 | 4.1 |  | 3.9 | 4.3 |  | 3.9 | 2.2 |
|  | Mixed/Other | 3.0 | 2.9 |  | 2.9 | 3.2 |  | 2.9 | 2.9 |  | 2.9 | 4.8 |
|  |  |  |  |  |  |  |  |  |  |  |  |  |
| **Mother/Grandmother Age** | | |  |  |  |  |  |  |  |  |  |  |
|  | <20 | 9.4 | 7.2 |  | 9.1 | 7.4 |  | 9.1 | 8.1 |  | 8.9 | 13.4 |
|  | 20-29 | 59.3 | 59.6 |  | 59.5 | 57.5 |  | 59.4 | 58.9 |  | 59.4 | 59.2 |
|  | 30+ | 31.3 | 33.2 |  | 31.4 | 35.1 |  | 31.5 | 33.0 |  | 31.7 | 27.4 |
|  |  |  |  |  |  |  |  |  |  |  |  |  |
| **Mother/Grandmother Parity** | | |  |  |  |  |  |  |  |  |  |  |
|  | Primiparous | 30.6 | 32.7 |  | 30.9 | 31.7 |  | 31.0 | 29.0 |  | 31.0 | 29.9 |
|  | Multiparous | 69.4 | 67.3 |  | 69.1 | 68.3 |  | 69.0 | 71.0 |  | 69.0 | 70.1 |
|  |  |  |  |  |  |  |  |  |  |  |  |  |
| **Mother/Grandmother Income** | | |  |  |  |  |  |  |  |  |  |  |
|  | Below Median | 37.3 | 32.4 |  | 36.6 | 33.6 |  | 36.5 | 33.5 |  | 36.3 | 38.1 |
|  | At Median | 15.8 | 15.0 |  | 15.7 | 15.7 |  | 15.6 | 18.0 |  | 15.7 | 18.5 |
|  | Above Median | 46.9 | 52.5 |  | 47.7 | 50.7 |  | 47.9 | 48.5 |  | 48.0 | 43.4 |
| Median based on 1960 Oakland, CA census | | | |  |  |  |  |  |  |  |  |  |
|  |  |  |  |  |  |  |  |  |  |  |  |  |
| **Mother/Grandmother Education** | | |  |  |  |  |  |  |  |  |  |  |
|  | < High School | 18.9 | 14.2 |  | 18.4 | 14.5 |  | 18.2 | 16.6 |  | 18.1 | 20.8 |
|  | High School | 39.4 | 35.8 |  | 39.0 | 35.5 |  | 38.9 | 34.0 |  | 38.8 | 38.5 |
|  | > High School | 41.7 | 50.0 |  | 42.6 | 50.0 |  | 42.9 | 49.4 |  | 43.2 | 40.7 |
|  |  |  |  |  |  |  |  |  |  |  |  |  |
| **Mother/Grandmother Occupation** | | | |  |  |  |  |  |  |  |  |  |
|  | Homemaker | 57.6 | 55.5 |  | 57.4 | 55.1 |  | 57.3 | 56.7 |  | 57.2 | 58.8 |
|  | Professional | 10.9 | 14.2 |  | 11.3 | 14.2 |  | 11.4 | 13.6 |  | 11.5 | 11.0 |
|  | Secretarial/Clerical | 24.2 | 25.0 |  | 24.3 | 25.2 |  | 24.3 | 23.2 |  | 24.4 | 21.3 |
|  | Service | 7.3 | 5.3 |  | 7.0 | 5.5 |  | 7.0 | 6.5 |  | 6.9 | 8.9 |
|  |  |  |  |  |  |  |  |  |  |  |  |  |
| **Mother/Grandmother Pre-pregnancy BMI** | | | |  |  |  |  |  |  |  |  |  |
|  | >25 kg/m2 | 15.1 | 13.6 |  | 15.0 | 12.8 |  | 14.9 | 14.0 |  | 14.8 | 18.2 |
|  | <25 kg/m2 | 84.9 | 86.4 |  | 85.0 | 87.2 |  | 85.1 | 86.0 |  | 85.2 | 81.8 |
| Table Notes: F1=1st Offspring Generation/Daughters; F2=2nd Offspring Generation/Granddaughters; CATI=Computer-Assisted Telephone Interview; IPV=In-Person Visit; Qx=Questionnaire; BMI=Body Mass Index | | | | | | | | | | | | |
