# Supplementary material for: Grandmaternal Perinatal Serum DDT in Relation to Granddaughter Early Menarche and Adult Obesity: Three Generations in the Child Health and Development Studies Cohort
Source: Oxford University Press journal article supplement (doi:10.1158/1055-9965.epi-20-1456), 2021-04-14
Supplement: 10559965epi201456-sup-232325_3_supp_6951561_qp5p67.docx [file 10559965epi201456-sup-232325_3_supp_6951561_qp5p67.docx]

| **Supplementary Table 2A. Associations1 of grandmothers’ (F0) serum *o,p’*-DDT with adult granddaughters’ (F2) Obesity (>30 v. <30 kg/m2), stratified by grandmothers’ BMI in fully adjusted model, n=258 triads** | | | | | | | | | | |
| --- | --- | --- | --- | --- | --- | --- | --- | --- | --- | --- |
| **Grandmothers’(F0) BMI <25 kg/m2, (n=182)** | | | | |  | **Grandmothers’ (F0) BMI >25 kg/m2, (n=76)** | | | | |
| **Parameter** | **Estimate** | **95% Confidence Limits** | | **P-value** |  | **Parameter** | **Estimate** | **95% Confidence Limits** | | **P-value** |
| **Intercept** | -6.6922 | -9.2047 | -4.1796 | <.0001 |  | **Intercept** | -4.9259 | -8.2822 | -1.5696 | 0.0040 |
| ***p,p'*-DDT (per ng/mL)** | -0.1291 | -0.2130 | -0.0452 | 0.0025 |  | ***p,p'*-DDT (per ng/mL)** | 0.0186 | -0.1107 | 0.148 | 0.7775 |
| **DDE (per ng/mL)** | 0.0069 | -0.0164 | 0.0302 | 0.5621 |  | **DDE (per ng/mL)** | 0.0235 | -0.0196 | 0.0666 | 0.2859 |
| ***o,p'*-DDT(per ng/mL)** | 1.1071 | -0.0025 | 2.2167 | 0.0505 |  | ***o,p'*-DDT(per ng/mL)** | -1.3658 | -2.7468 | 0.0153 | 0.0526 |
| **F1 BMI at age 30**  **(per kg/m2)** | 0.2239 | 0.1281 | 0.3197 | <.0001 |  | **F1 BMI at age 30**  **(per kg/m2)** | 0.1635 | 0.0614 | 0.2656 | 0.0017 |
| **African American**  **(vs. else)** | 0.9350 | 0.0319 | 1.838 | 0.0424 |  | **African American**  **(vs. else)** | 0.6810 | -0.5229 | 1.8849 | 0.2676 |
| 1Associations are estimated from log-linear models adjusted for family clustering and stratified by F0 BMI (categorized as <25 kg/m2 vs >25 kg/m2). The continuous term for F1 BMI was reported for age 30 nearest the age when F1 were pregnant with F2. | | | | | | | | | | |

**SEE NEXT PAGE ⮷**

| **Supplementary Table 2B. Associations1 of grandmothers’ (F0) serum *o,p’*-DDT with granddaughters’ (F2) early menarche in fully adjusted model, n=235 triads** | | | | |
| --- | --- | --- | --- | --- |
| **Parameter** | **Estimate** | **95% Confidence Limits** | | **P-value** |
| **Intercept** | 0.3702 | -3.7726 | 4.5130 | 0.8610 |
| ***p,p'*-DDT (per ng/mL)** | -0.0801 | -0.1475 | -0.0127 | 0.0199 |
| **DDE (per ng/mL)** | 0.0083 | -0.0095 | 0.0262 | 0.3599 |
| ***o,p'*-DDT(per ng/mL)** | 0.8518 | 0.1219 | 1.5818 | 0.0222 |
| **F0 Age at Menarche (continuous yrs)** | -0.1458 | -0.3787 | 0.0872 | 0.2200 |
| **F1 Age at Menarche (continuous yrs)** | -0.0371 | -0.2065 | 0.1323 | 0.6675 |
| **African American (vs. else)** | 0.2056 | -0.5256 | 0.9368 | 0.5815 |
| **F1 BMI at age 30 (per kg/m2)** | 0.0476 | -0.0015 | 0.0966 | 0.0572 |
| 1Early menarche was defined as age <11 vs. >11 years based on the 25th percentile for the distribution of F2 age at menarche. Associations are estimated from a log-linear model adjusted for family clustering. The model included continuous terms for p,p’-DDT, p,p’-DDE, o,p’-DDT, F0 age at menarche (continuous), F1 age at menarche (continuous), race dichotomized as African American (1) vs. all other races (0), and F1 BMI at age 30 (continuous). | | | | |
