# Supplementary material for: Grandmaternal Perinatal Serum DDT in Relation to Granddaughter Early Menarche and Adult Obesity: Three Generations in the Child Health and Development Studies Cohort
Source: Oxford University Press journal article supplement (doi:10.1158/1055-9965.epi-20-1456), 2021-04-14
Supplement: 10559965epi201456-sup-232325_3_supp_6951563_qp5pz7.docx [file 10559965epi201456-sup-232325_3_supp_6951563_qp5pz7.docx]

| **Supplementary Table 3A.Associations1 of grandmothers’ (F0) serum *o,p’*-DDT tertiles with adult F2 obesity (>30 vs. <30 kg/m2), stratified by grandmothers’ BMI, n=258 triads** | | | | | | | | |
| --- | --- | --- | --- | --- | --- | --- | --- | --- |
| **Grand-maternal (F0) BMI2 <25 kg/m2**  **(n=182)** | | | |  | **Grand-maternal (F0) BMI2 >25 kg/m2**  **(n=76)** | | | |
| **Tertile** | ***o,p’*-DDT Coefficient** | **(95% CI3)** | **p-value** |  | **Tertile** | ***o,p’*-DDT Coefficient** | **(95% CI3)** | **p-value** |
|  |  |  |  |  |  |  |  |  |
| 1 | Reference | Reference | Reference |  | 1 | Reference | Reference | Reference |
| 2 | 2.46 | (0.90, 6.72) | 0.0804 |  | 2 | 1.66 | (0.32, 8.50) | 0.5423 |
| 3 | 4.32 | (1.23, 15.22) | 0.0228 |  | 3 | 0.79 | (0.13, 4.64) | 0.7921 |
|  |  |  |  |  |  |  |  |  |
| 1Associations are estimated from log-linear models adjusted for family clustering, and stratified by F0 BMI (categorized as <25 kg/m2 vs >25 kg/m2). Stratified models included two indicator variables for tertiles 2 and 3 of each DDT compound, *p,p’*-DDT, *p,p’*-DDE and *o,p’*-DDT, where tertile 1 was the reference category for each. Rationale for using stratified models is based on p-values for interaction terms presented in Table 2. | | | | | | | | |

| **Supplementary Table 3B.Associations1 of grandmothers’ (F0) serum *o,p’*-DDT tertiles with**  **F2 early menarche (age <11 vs. >11 years)**  **n=235 triads** | | | |
| --- | --- | --- | --- |
| **Tertile** | ***o,p’*-DDT Coefficient** | **(95% CI3)** | **p-value** |
|  |  |  |  |
| 1 | Reference | Reference | Reference |
| 2 | 4.33 | (1.86, 10.10) | 0.0007 |
| 3 | 2.74 | (0.98, 7.67) | 0.0544 |
|  | | | |
| 1Associations are estimated from log-linear models adjusted for family clustering. Models included two indicator variables for tertiles 2 and 3 of each DDT compound, *p,p’*-DDT, *p,p’*-DDE and *o,p’*-DDT, using tertile 1 as the reference. | | | |
