# Supplementary material for: Grandmaternal Perinatal Serum DDT in Relation to Granddaughter Early Menarche and Adult Obesity: Three Generations in the Child Health and Development Studies Cohort
Source: Oxford University Press journal article supplement (doi:10.1158/1055-9965.epi-20-1456), 2021-04-14
Supplement: 10559965epi201456-sup-232325_3_supp_6951673_qp5p67.docx [file 10559965epi201456-sup-232325_3_supp_6951673_qp5p67.docx]

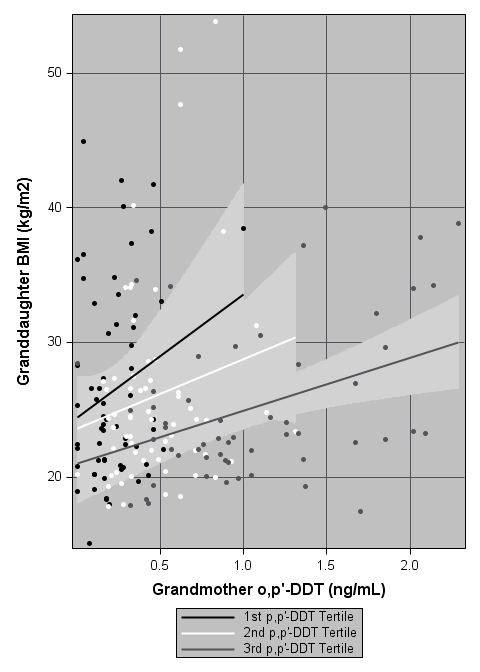


**Supplementary Figure 1.** Scatter plot of granddaughters’ BMI (kg/m2) by grandmothers’ perinatal serum *o,p’*-DDT within *p,p’*-DDT tertile among grandmothers who were not overweight in pregnancy. Linear regression lines with 95% confidence limits are depicted. Grandmothers’ *o,p’*-DDT showed a positive association with granddaughters’ BMI within DDT tertiles, consistent with the association estimated in Supplementary Table 1A.
